1 **Full title:** Causes of death among hospitalized adults with dengue fever

2 in Tainan, 2015: emphasis on cardiac events and bacterial infections

3

4 **Short title:** Causes of death among hospitalized adults with dengue fever

5

6 Jen-Chieh Lee<sup>1</sup>, Cong-Tat Cia<sup>1</sup>, Nan-Yao Lee<sup>1,2</sup>, Nai-Ying Ko<sup>4,5,6</sup>, Po-Lin Chen<sup>1,2,3,7\*</sup>,

7 Wen-Chien Ko<sup>1,2,3\*</sup>

8

9 <sup>1</sup> Department of Internal Medicine, National Cheng Kung University Hospital,

10 College of Medicine, National Cheng Kung University, Tainan, Taiwan

11 <sup>2</sup> Center for Infection Control, National Cheng Kung University Medical College and

12 Hospital, Tainan, Taiwan

13 <sup>3</sup> Department of Internal Medicine, College of Medicine, National Cheng Kung

14 University, Tainan, Taiwan

15 <sup>4</sup> Institute of Allied Health Sciences, Collage of Medicine, National Cheng Kung

16 University, Tainan, Taiwan

17 <sup>5</sup> Department of Public Health, Collage of Medicine, National Cheng Kung

18 University, Tainan, Taiwan

19 <sup>6</sup> Department of Nursing, College of Medicine, National Cheng Kung University,

20 Tainan, Taiwan

21 <sup>7</sup> Department of Microbiology and Immunology, College of Medicine, National

22 Cheng Kung University

23

24 \*Corresponding author:

25 E-mail address: [winston3415@gmail.com](mailto:winston3415@gmail.com) (WCK); [cplin@mail.ncku.edu.tw](mailto:cplin@mail.ncku.edu.tw) (PLC)

26

27 **Keyword:** dengue fever, fatality, mortality, bacterial infection, bacteremia, cardiac

28 arrest, Taiwan

## 29 Abstract

30 **Introduction.** The 2015 dengue outbreak in southern Taiwan caused substantial  
31 mortality rates in the elderly. We analyzed here the causes of death among adults with  
32 dengue.

33 **Methods.** The retrospective study was conducted at a medical center in Tainan from  
34 the 1<sup>st</sup> of August to 31<sup>th</sup> of December in the year 2015. The detection of the dengue  
35 NS1 antigen IgM or viral RNA in patients' blood were used to diagnose dengue.  
36 Clinical courses and causes of death were retrieved from chart reviews by two  
37 intensivists.

38 **Results.** There were 4,488 cases of dengue diagnosed in the study hospital, and these  
39 cases had an in-hospital case fatality rate of 1.34% (60 cases). Of these, the mean age  
40 was 73 years and gender did not predict outcome. Twenty-eight (46.7%) cases died of  
41 severe dengue, and 29 (48.3%) deaths were possibly caused by dengue-related  
42 complications, which were mostly secondary infections (24 cases). Most of the  
43 families of fatal case (70%) signed do-not-resuscitate (DNR) orders prior to the  
44 patients' death. When the dengue epidemic peaked, 13 cardiac arrest events, including  
45 out-of-hospital (5 events) and in-hospital (8) cardiac arrests at the emergency  
46 department, occurred within four weeks of the dengue epidemic. Notably, in half (7)  
47 of these cases, the patients did not search for medical aid prior to experiencing cardiac  
48 arrest. Of the 40 cases that had early death (occurring within one week after  
49 hospitalization), 60% died of severe dengue. In contrast, 50% of the 20 deaths that  
50 occurred later than one week after hospitalization were related to hospital-acquired  
51 infections, mainly pneumonia.

52 **Conclusion.** The elderly that experience dengue fever may die of severe dengue early

53 or die of secondary infections later. Cardiac arrests can also occur unpredictably at the  
54 first aids, which highlight the need of professional and patient education regarding the  
55 danger signs that are related to severe dengue in an epidemic setting.

## 56 **Author summary**

57       The 2015 dengue outbreak in Tainan City caused substantial deaths among the  
58   elderly. The main causes of death were severe dengue and its complications. We here  
59   highlight the deaths caused by heart complications of dengue that the elderly has  
60   underlying cardiovascular comorbidities is more prone to be involved. The  
61   presentations of heart complications vary, ranging from arrhythmia to myocarditis and  
62   to unexpected cardiac arrest. Clinicians should carefully evaluate and monitor the  
63   heart function of patients with severe dengue and provide timing intervention.  
64   Secondary infections or healthcare-associated infections may occur throughout the  
65   whole hospitalized course. They were also the leading causes of death during the late  
66   or recovery phase of dengue in the study. Judicious application of antimicrobial  
67   agents and early elimination of infection source may be beneficial. Overall, the  
68   substantial deaths during this outbreak may be related to low public awareness of  
69   dengue, emergency department overclouding, and lack of clinical experience.  
70   Professional and public education regarding the danger signs that are related to severe  
71   dengue is necessary in an epidemic setting.

## Introduction

Dengue is a mosquito-borne viral disease that affects humans and is emerging as a major threat to public health throughout the tropics and subtropics [1, 2]. Dengue affects children primarily in hyper-endemic areas [3] where epidemiological studies have shown the susceptible age group moved toward older children and adults [4]. Taiwan is not a hyperendemic area, but dengue outbreaks develop almost every year [5, 6]. Dengue predominantly affects adults in Taiwan. The highest prevalence rate is among people in their sixties [6]. During 2015, a large-scale dengue outbreak, which was caused by the dengue virus serotype 2, occurred in Tainan City [7] and a total of 22,777 dengue cases were confirmed [8]. Among these, 2%-3% had severe diseases or complications that required intensive care [9, 10]. However, with the increased utilization of intensive care units, the hospital stays for severe dengue patients were prolonged and more invasive devices were used. Healthcare-associated infections thus became unavoidable during the recovery phase.

Atypical presentations of dengue in the elderly are not uncommon [11] and make early diagnoses difficult. With multiple comorbidities complicating the clinical course of dengue, the elderly has more severe presentations and a higher mortality rate than children and young adults during this outbreak [12]. To know their cause of deaths may alarm early symptoms and signs of life-threatening conditions to clinicians. However, this information was limited in the literature. A two-year review in Malaysia has discussed deaths that were directly caused by dengue [13]. The causes of death stratified by the pathophysiology of dengue fever include dengue shock syndrome, severe bleeding, and severe organ involvement. Two case series that include seven and ten cases, respectively, mention deaths that were related to the complications other than dengue [14, 15]. Other studies that have paramedical points

97 of view, discuss how these factors involve clinicians, patients, and the medical  
98 system, will lead to dengue death [16, 17]. The present study aimed to analyze the  
99 causes of death among dengue patients that were cared at a medical center in 2015.

# **Methods**

## **Case inclusion**

The study was conducted at the National Cheng Kung University Hospital (NCKUH), a medical center in southern Taiwan, between August 1<sup>st</sup> and December 31<sup>th</sup> in the year 2015. Cases of dengue were identified from the dengue notification in the Infection Control Center, NCKUH. The diagnosis of dengue fever was established by the documentation of dengue NS1 antigen (Bioline Dengue NS1 Ag kit, Standard Diagnostics Inc., Korea), dengue IgM (Bioline Dengue Duo kit, Standard Diagnostics Inc., Korea), or dengue virus RNA (TIB Molbiol, Lightmix kit, Roche Applied Science, Berlin, Germany) in the sera or blood of the patients. The study protocol was approved by the Institutional Review Board at NCKUH (A-ER-104-386) and informed consents were waived. The study was funded by Ministry of Health and Welfare, Taiwan, with award number: MOHW107-TDU-B-211-123003. The funders had no role in study design, data collection and analysis, decision to publish, or preparation of the manuscript.

## **Definitions**

Cardiac arrest events at the emergency department (ED) included out-hospital cardiac arrest (OHCA) and in-hospital cardiac arrest (IHCA). The weekly mortality rate was determined as the ratio of fatal case number and the number of newly diagnosed cases of dengue fever during the indicated week. Typical presentations of dengue fever included fever with two of the following symptoms or signs: nausea/vomiting, rash, aches/pains, positive tourniquet test, leucopenia, or any of warning signs [18]. If the initial manifestations of dengue did not fulfil the above criteria of the typical presentations, these cases were considered to be atypical. The



severity of dengue fever was graded using the WHO guidelines issued in 2009 [18]. Group A includes those without warning signs, Group B those with warning signs, co-existing complicated conditions, or special social circumstances, and Group C includes those with the signs of severe plasma leakage, severe hemorrhages, or severe organ impairment. Plasma leakage was supported by a hematocrit change of more than 20% or the presence of pleural effusion or ascites. Unstable vital signs indicate the presence of hypotension (systolic pressure less than 90 mmHg or mean pressure less than 65 mmHg), impending respiratory failure, or altered mental status. The age-modified Charlson's index was used to evaluate comorbidity status [19]. Days of hospitalization here were included days of ED stay.

Organ failure associated with dengue fever was defined as the dysfunction of the cardiovascular system, respiratory system, nervous system, liver, or kidney after dengue onset. Cardiovascular failure was defined as the patients having a mean blood pressure of less than 65 mmHg, the need of inotropic agents to maintain blood pressure, or low cardiac output signs. Respiratory failure was defined as a  $\text{PaO}_2/\text{FiO}_2$  ratio of less than 300 [20] or  $\text{PaCO}_2$  more than 50 mmHg [21], with or without increased breathing effort. Nervous system failure was characterized as the patient having a Glasgow Coma scale score of less than 8 [22]. Serum bilirubin level of more than 2 mg/dl was regarded as liver failure [20]. The KDIGO criteria were applied to define renal failure, *i.e.*, an increase of serum creatinine levels of more than twice the baseline level or more than 4 mg/dl, urine output of less than 0.3 ml/kg/hour over 24 hours, or anuria for 12 hours [23]. Multiorgan failure was defined as the presence of failure of more than two organ systems.

## Causes of death

Cause of death in the cases of dengue fever was evaluated by two intensivists with complete training in infectious diseases. The causes of death were categorized into three groups. Death was considered to be related to “severe dengue” if the patient died of severe plasma leakage, major bleeding, or organ failures. If the patient died of organ failures but we were unable to attribute this death solely to severe dengue, the death was classified as “possibly dengue related”. If there were other clinical diseases that inevitably lead to death, the cause of death was classified as “other”.

# **Data acquisition**

All parameters including demographic information, underlying disease, status of organ system dysfunction, date and cause of death, dengue onset, date of hospital visiting, and timing of the do-not-resuscitation (DNR) order, were obtained and calculated from electronic medical records.

# **Statistical methods**

To analyze the causes of death, patients were further stratified into deaths within one week of hospitalization and deaths after one week. Chi-squared or Fisher exact tests were used to compare categorical variables between groups. Continuous variables were compared using a Student’s t-test. All data were processed using SPSS (20th edition, IBM). A *P* value of less than 0.05 is denoted as significant.

## 170 Result

171 During the study period, there were 4,488 hospitalized cases of serologically  
172 documented dengue in NCKUH, Tainan. Among these patients, 60 died with a crude  
173 in-hospital mortality rate of 1.34%, and 40 (66.7%) died within seven days of  
174 hospitalization. The mortality rate reached a peak of 1.57% during the 40th week and  
175 the case number reached its peak in the 36th week of 2015.

176 The mean age of patients in fatal cases was 73 years and the major underlying  
177 medical illnesses were hypertension (32 cases, 53.3%), diabetes mellitus (30, 50%),  
178 and chronic kidney disease (20, 33.3%), as shown in Table 1.

179

**Table 1.** Clinical characteristics of 60 fatal cases of dengue fever.

| Parameters                                      | Case No. (%)    |
|-------------------------------------------------|-----------------|
| Age (mean $\pm$ standard deviation), years      | 73.4 $\pm$ 12.4 |
| Underlying disease                              |                 |
| Hypertension                                    | 32 (53.3)       |
| Diabetes mellitus                               | 30 (50.0)       |
| Chronic kidney disease                          | 20 (33.3)       |
| Cancer                                          | 16 (26.7)       |
| Coronary arterial disease                       | 15 (25.0)       |
| Neurological disease                            | 12 (20.0)       |
| Rheumatic disease                               | 8 (13.3)        |
| Congestive heart failure                        | 7 (11.7)        |
| Chronic hepatitis                               | 7 (11.7)        |
| Liver cirrhosis                                 | 4 (6.7)         |
| Chronic obstructive pulmonary disease or asthma | 4 (6.7)         |
| Chronic renal replacement therapy               | 2 (3.3)         |
| Recent chemotherapy                             | 2 (3.3)         |

---

Neurological disease indicates one or more of old stroke, dementia, parkinsonism, or multiple sclerosis.

180

181       As for the causes of death, 46.7% (28 cases) died of severe dengue, and 65%  
 182 (39) of the deaths were possibly related to dengue (Table 2). Of the later, a substantial  
 183 proportion (40%, 24 cases) died of secondary infections. Two (3.3%) deaths were  
 184 related to acute renal failure, and two (3.3%) died of respiratory failure without  
 185 advanced airway management. A patient that refused interventional procedures died  
 186 of massive gastrointestinal bleeding, which occurred while the patient had a platelet  
 187 count of  $94 \times 10^9/L$  during the 22<sup>nd</sup> day of hospitalization. Three patients died from a  
 188 brain tumor, medication suffocation, and a traffic accident that caused a skull bone  
 189 fracture and intracranial hemorrhage and were coincident with dengue fever,  
 190 respectively.

191

**Table 2.** Clinical characteristics of the deaths of adults with dengue fever occurring  $\leq 1$  week and  $>1$  week after their hospitalization.

| Variables                                  | Death after hospitalization |                 | <i>P</i><br>value |
|--------------------------------------------|-----------------------------|-----------------|-------------------|
|                                            | $\leq 1$ week, n=40         | $>1$ week, n=20 |                   |
| Age (mean $\pm$ standard deviation), years | 73.1 $\pm$ 13.4             | 75.2 $\pm$ 10.5 | 0.52              |
| Male gender                                | 17 (42.5)                   | 13 (65)         | 0.17              |
| Causes of death                            |                             |                 |                   |
| Severe dengue                              | 24 (60)                     | 4 (20)          | 0.03              |
| Intracranial hemorrhage                    | 2 (5)                       | 3 (15)          | 0.32              |
| Cardiac events                             | 5 (12.5)                    | 0 (0)           | 0.16              |
| Possibly dengue-related                    | 14 (35)                     | 15 (75)         | 0.003             |
| Secondary infections                       | 14 (35)                     | 10 (50)         | 0.58              |
| Bacteremia                                 | 6 (15)                      | 0 (0)           | 0.17              |
| Candidemia                                 | 2 (5)                       | 1 (5)           | 1                 |
| Pneumonia                                  | 5 (12.5)                    | 8 (40)          | 0.02              |
| Pneumonia and bacteremia                   | 1 (2.5)                     | 0 (0)           | 1                 |
| Necrotizing fasciitis                      | 0 (0)                       | 1 (5)           | 0.33              |
| Renal failure and its complication         | 0 (0)                       | 2 (10)          | 0.11              |
| Respiratory failure                        | 0 (0)                       | 2 (10)          | 0.11              |
| Lower gastrointestinal bleeding            | 0 (0)                       | 1 (5)           | 0.33              |
| Others                                     | 2 (5)                       | 1 (5)           | 1                 |
| Do-not-resuscitate                         | 24 (60)                     | 18 (90)         | 0.02              |
| Cardiac arrest events at ED                | 13 (32.5)                   | 0 (0)           | 0.03              |

ED, emergency department

192

193       The death causes were compared between those dying within one week and those  
194 after one week of hospitalization (Table 2). For the former, the primary causes of  
195 death were severe dengue (24 cases, 60%) and secondary infection (14, 35%). Of the  
196 24 deaths caused by severe dengue, five (12.5%) died from cardiac events that

included fatal arrhythmia, myocarditis, and refractory heart failure. Among those that died after one week of hospitalization, the major causes of death were secondary infections (10 cases, 50%), renal failure (2, 10%), and respiratory failure (2, 10%). There were four (20%) cases in which the patients died from severe dengue. Of these, three (15%) died from intracranial hemorrhage, which developed during the critical phase of dengue. Candidemia can occur either early (within one week, two cases) or late (after one week, one case) during hospitalization. In contrast, among the seven fatal cases in which death was caused by bacteremia, all of these deaths occurred during the first week.

The mortality rate and the number of new cases and cardiac arrest events at the ED by week are shown in Figure 1. Of note, 13 cardiac arrest events occurred between the 36th and 39th week of 2015, also when the dengue outbreak peaked. Among the cases that had cardiac arrest, five occurred out-of-hospital cardiac arrest (OHCA) and eight had in-hospital cardiac arrest (IHCA) while staying at the ED (Table 3).

**Figure 1. Weekly notified dengue cases in the study hospital and early mortality rates.** The case number of newly diagnosed dengue patients came to peak in the Week 36 while the early mortality rate (*i.e.*, death within the first week of hospitalization). peaked in the Week 40. Cardiac arrest events occurred mainly in Week 36-39 when the outbreak was in full swing. An asterisk (\*) indicates a cardiac arrest event at the emergency department.

**Table 3.** Characteristics of 13 cardiac arrest events at the emergency department.

| Serial No.                         | OHCA |     |     |     |    | IHCA |    |    |    |    |     |     |     |
|------------------------------------|------|-----|-----|-----|----|------|----|----|----|----|-----|-----|-----|
|                                    | 1    | 2   | 3   | 4   | 5  | 6    | 7  | 8  | 9  | 10 | 11  | 12  | 13  |
| Age                                | 62   | 80  | 62  | 55  | 69 | 83   | 76 | 74 | 76 | 70 | 78  | 45  | 41  |
| Gender                             | M    | F   | M   | F   | F  | F    | F  | F  | M  | M  | F   | M   | F   |
| Latest ED arrival to CPR, hours    |      |     |     |     |    | 46   | 14 | 22 | 4  | 7  | 20  | 1   | 39  |
| Prior ED or OPD visits             | No   | Yes | Yes | Yes | No | No   | No | No | No | No | Yes | Yes | Yes |
| WHO grade on latest ED arrival     | C    | C   | C   | C   | C  | B    | B  | B  | B  | C  | B   | C   | A   |
| Underlying disease                 |      |     |     |     |    |      |    |    |    |    |     |     |     |
| Charlson's comorbidity index       | 9    | 8   | 6   | 5   | 3  | 9    | 6  | 6  | 5  | 5  | 4   | 3   | 1   |
| Central nervous system disease     |      |     | •   |     |    |      |    |    |    | •  |     |     |     |
| Coronary arterial disease          | •    | •   | •   |     |    | •    |    |    |    | •  |     |     |     |
| Heart failure                      |      | •   |     |     |    |      |    |    |    |    |     |     |     |
| Hypertension                       |      | •   |     |     |    | •    | •  | •  | •  | •  |     |     |     |
| Liver disease                      |      |     |     |     |    |      |    |    |    |    |     | •   |     |
| Chronic kidney disease             | •    | •   |     |     |    | •    | •  | •  |    |    |     |     |     |
| Diabetes mellitus                  | •    |     | •   | •   |    |      |    |    | •  | •  |     |     |     |
| Cancer                             |      |     |     | •   |    |      |    |    |    |    |     |     |     |
| Unstable vital signs at the triage | •    | •   | •   | •   | •  |      |    |    | •  | •  |     | •   |     |
| Thrombocytopenia at ED             | •    |     |     |     | •  | •    | •  | •  |    | •  | •   | •   |     |
| Evidence of plasma leakage at ED   |      | •   |     | •   |    | •    | •  | •  |    | •  | •   | •   |     |
| Interval from onset to death, days | ND   | 4   | ND  | 6   | 0  | 6    | 1  | 3  | 0  | 2  | 5   | 0   | 5   |

CPR, cardiopulmonary resuscitation; ED, emergency department; IHCA, in-hospital cardiac arrest at the ED; ND: no data; OHCA, out-of-hospital cardiac arrest; OPD, outpatient department.

219

220       The intervals between ED arrival and the IHCA event varied, ranging between

221 one and 46 hours. The estimated interval between dengue onset and death ranged

222 between 0 and 6 days. Ages in these cases ranged between 41 and 83 years and the

223 Charlson's index ranged between 1 and 9. Of these 13 cases, 7 cases did not search

224 for medical aid prior to the events, and 12 cases presented to the ED with severe

225 dengue (WHO Grade B or C). The exception was a case of WHO Grade A disease

226 that died soon after the onset of upper back pain with diffuse ST-T elevation (Figure

227 2) in electrocardiography records at the ED. This is shown as case 13 in Table 3.

228

229 **Figure 2. Electrocardiography record from a patient with dengue fever that was**

230 **dying of myocarditis.** The diagnosis of myocarditis was suggested by the diffuse ST-

231 T elevation (case 13 in Table 3).

232

233       Of the 60 fatal cases, 70% (42) signed do-not-resuscitate (DNR) orders prior to

234 their death (Table 4), and two thirds (28 cases) of DNR decisions were made within

235 one week after their hospital arrival. Of note, DNR was requested in six cases without

236 organ failure, twelve with failure of one organ system, and eight with failure of two

237 organ systems



**Table 4.** Number of organ failures in the 42 fatal cases of dengue fever at the time of the do-not-resuscitate (DNR) signature.

| Parameters                                        | Case No. (%) |
|---------------------------------------------------|--------------|
| No organ failure                                  | 6 (14.3)     |
| Failure of one organ system                       | 12 (28.6)    |
| Respiratory failure                               | 5 (11.9)     |
| Renal failure requiring renal replacement therapy | 4 (9.5)      |
| Cardiovascular failure                            | 2 (4.8)      |
| Central nervous system (CNS) failure              | 1 (2.4)      |
| Failure of two organ systems                      | 8 (19.0)     |
| Renal and respiratory failure                     | 3 (7.1)      |
| CNS and respiratory failure                       | 3 (7.1)      |
| Cardiovascular and respiratory failure            | 1 (2.4)      |
| CNS and renal failure                             | 1 (2.4)      |
| Multiorgan failure                                | 16 (38.1)    |

## 238 Discussion

239 The 2015 dengue outbreak in southern Taiwan came to its peak in early  
 240 September. The mortality rate of patients included in this study reached its peak  
 241 during Week 40. Of note, the majority of the sudden death events, including OHCA  
 242 and IHCA at the ED, occurred within the first four weeks of the dengue outbreak.  
 243 This is likely related to the following: first, public awareness of dengue was low  
 244 during the early phase of the epidemic and less than one half (6) of the 13 patients that  
 245 experienced cardiac arrest sought medical care before their death. Early medical care  
 246 could be life-saving before dengue deteriorated [13-15]. Second, ED overclouding  
 247 may be associated with increased mortality rates and morbidity [24, 25], and the role  
 248 of patient diversion [24, 26] and the short stay ward at the ED [27] during large  
 249 outbreaks of infectious diseases is mentioned. With the implementation of a patient  
 250 diversion program in Tainan, and dengue rapid screening clinics in the study hospital,  
 251 the ED patient burden was correspondingly decreased, which may facilitate optimal  
 252 initial care for the elderly that have severe dengue. Third, a lack of clinical experience  
 253 in the ED professional staff may delay the timely diagnosis and appropriate care for  
 254 severe diseases. A recent study found that case management training can improve  
 255 dengue outcomes [28] and protocolized care may accelerate the transformation of  
 256 knowledge [29] and help inexperienced healthcare providers.

257 Dengue in Taiwan often involves the elderly [6], for which the diagnosis of  
 258 dengue may be challenging because of atypical presentations [5, 30]. The febrile  
 259 elderly with leucopenia has been referred to as a trigger for diagnostic laboratory tests  
 260 for dengue fever [31]. The clinical symptoms and signs that are presumably linked to  
 261 underlying comorbidities in the elderly can further delay the diagnosis of dengue.  
 262 More than half of our patients had atypical presentation during their initial medical

visits, and the diagnosis of infection with the dengue virus was delayed in eight cases. Thus, to achieve the goal of early diagnosis, clinical suspicion of dengue should not be limited to the typical dengue fever “criteria” in endemic settings.

In our series, five OHCA and eight IHCA cases that had atypical presentation at the ED had a fulminant course. Not all fatal dengue cases received optimal intensive care in the ED before their death. Thrombocytopenia was not observed in five cases, and five had no evidence of plasma leakage, contradictory to severe manifestations of dengue fever [18]. Closely laboratory test and vital sign monitoring may be necessary in patients really needed intensive care. Another potentially fatal complication of dengue fever is pericardiomylcarditis, which is illustrated by sudden collapse, diffuse ST-T elevation in electrocardiograms (Figure 2), and elevated serum cardiac enzymes, but without thrombocytopenia or plasma leakage.

The overall mortality rate of hospitalized patients with dengue fever in the study hospital was 1.3%. Multiple factors, such as increased age or epidemic serotype 2 dengue virus, may contribute to the substantial mortality rate in our study. One potential contributing sociocultural factor is the DNR signature during hospitalization in up to 70% of fatal cases. Through advances in organ support, those with severe dengue may have a greater chance to survive, but DNR orders precludes the intensive care provided by healthcare workers. In Taiwan, old age is the main factor in signing DNR orders in critically ill patients [32, 33]. A study in Taiwan revealed that patients with renal failure had the highest percentage of signed DNR orders [34]. Furthermore, aspects of Taiwanese culture caused many to refuse tracheostomy [35]. We observed that dengue patients with DNR orders and without organ failure were older than those with organ failures, although the difference was not significant. However, their prognosis may remain poor even without a DNR order under advanced medical

support.

To further analyze the causes of death, more than half of the early deaths (*i.e.*, deaths within one week of hospitalization) were related to severe dengue with either plasma leakage or major bleeding. However, there were three cases in which the patients experienced rapid organ failure without evidence of plasma leakage and major bleeding. In contrast, the two main causes of death that occurred after one week of hospitalization were healthcare-associated bacterial infections and organ dysfunction that was related to severe dengue. Identifying secondary infections among hospitalized dengue patients is critical during dengue epidemics. The primary pathogens that caused bacteremia in dengue patients were *Staphylococcus aureus*, *Streptococcus* species, and *Enterobacteriaceae* [36]. Old age, comorbidities, severe disease with gastrointestinal bleeding, prolonged activated prothrombin time, and acute renal failure were recognized as risk factors for concurrent bacteremia [37-39]. Laboratory parameters, such as leukocyte count [38], serum C-reactive protein [39], and procalcitonin [40], may be useful to differentiate those with concurrent bloodstream infections from those that had only dengue virus infection alone.

One unique finding in the present study is that cardiac events were associated with dengue virus infection. Before their death, five patients suffered cardiac events, including heart failure with cardiogenic shock or pulmonary edema, fatal arrhythmia, and fulminant myocarditis. In the literature, the disease spectrum for cardiac involvement in dengue patients was wide and ranged from subclinical functional myocardial impairment to fulminant myocarditis [41, 42]. Fluid resuscitation may predispose patients with impaired cardiac function to pulmonary edema, and arrhythmias may be induced when plasma leakage or renal function impairment was ongoing. Patients with risk factors, such as old age, underlying cardiovascular disease,

313 abnormal electrocardiogram findings, elevated cardiac enzymes, and shock  
 314 unresponsive to fluid resuscitation, warrant further evaluation by cardiac specialists  
 315 [43].

316 Our study has several limitations. First, this study was conducted at a single  
 317 medical center in southern Taiwan, which provided care for more than half of the  
 318 critical patients from Tainan City during the 2015 dengue epidemic. Second, the data  
 319 were collected retrospectively, and certain important parameters, such as the time of  
 320 disease onset and detailed symptoms and signs, cannot be obtained from medical  
 321 records. Third, the causes of death were clinically categorized and cannot be verified  
 322 by autopsy. However, the study results were recorded by two experienced intensivists  
 323 who had the Taiwan board of infection disease specialization.

324 In conclusion, elderly patients with severe dengue are at risk of fatal cardiac  
 325 events and secondary infections. Absence of medical care among one half of adults  
 326 with cardiac arrest reveals the importance of health education for the public during  
 327 dengue epidemics.

## 328    **Acknowledgement**

329            We thank Chih-Cheng Hsieh and Wei-Chieh Lin for their help in  
330    conceptualization of the study and preparing the manuscript.

# References

1. Gibbons RV, Vaughn DW. Dengue: an escalating problem. *Brit Med J*. 2002;324: 1563-6.
2. Halstead SB. Dengue. *Lancet*. 2007;370:1644-52.
3. Gubler DJ. Dengue and dengue hemorrhagic fever. *Clin Microbiol Rev*. 1998;11:480-96.
4. Lin RJ, Lee TH, Leo YS. Dengue in the elderly: a review. *Expert Rev Anti Infect Ther*. 2017;15:729-35.
5. Lin CC, Huang YH, Shu PY, Wu HS, Lin YS, Yeh TM, et al. Characteristic of dengue disease in Taiwan: 2002-2007. *Am J Trop Med Hyg*. 2010;82:731-9.
6. Hsu JC, Hsieh CL, Lu CY. Trend and geographic analysis of the prevalence of dengue in Taiwan, 2010-2015. *Int J Infect Dis*. 2017;54:43-49
7. Wang SF, Chang K, Loh EW, Wang WH, Tseng SP, Lu PL, Chen YH4, Chen YA. Consecutive large dengue outbreaks in Taiwan in 2014-2015. *Emerg Microbes Infect*. 2016;5:e123.
8. Center of Disease Control, Taiwan. National Infectious Disease Statistics system. [https://nidss.cdc.gov.tw/ch/NIDSS\\_DiseaseMap.aspx?dc=1&dt=2&disease=061](https://nidss.cdc.gov.tw/ch/NIDSS_DiseaseMap.aspx?dc=1&dt=2&disease=061)
9. Hsieh CC, Cia CT, Lee JC, Sung JM, Lee NY, Chen PL, Kuo TH, Chao JY, Ko WC. A cohort study of adult patients with severe dengue in Taiwanese intensive care units: the elderly and APTT prolongation matter for prognosis. *PLoS Negl Trop Dis*. 2017;11:e0005270.
10. Chen CM, Chan KS, Yu WL, Cheng KC, Chao HC, Yeh CY, Lai CC. The outcomes of patients with severe dengue admitted to intensive care units. *Medicine (Baltimore)*. 2016;95:e4376.
11. Lee CC, Hsu HC, Chang CM, Hong MY, Ko WC. Atypical presentations of

356 dengue disease in the elderly visiting the ED. *Am J Emerg Med*. 2013;31:783-7.

357 12. Yeh CY, Chen PL, Chuang KT, Shu YC, Chien YW, Perng GC, Ko WC, Ko  
358 NY. Symptoms associated with adverse dengue fever prognoses at the time of  
359 reporting in the 2015 dengue outbreak in Taiwan. *PLoS Negl Trop Dis*.  
360 2017;11:e0006091.

361 13. Woon YL, Hor CP, Hussin N, Zakaria A, Goh PP, Cheah WK. A two-year  
362 review on epidemiology and clinical characteristics of dengue deaths in  
363 Malaysia, 2013-2014. *PLoS Negl Trop Dis*. 2016;10:e0004575.

364 14. Ong A, Sandar M, Chen MI, Sin LY. Fatal dengue hemorrhagic fever in adults  
365 during a dengue epidemic in Singapore. *Int J Infect Dis*. 2007;11:263-7.

366 15. Sam SS, Omar SF, Teoh BT, Abd-Jamil J, AbuBakar S. Review of dengue  
367 hemorrhagic fever fatal cases seen among adults: a retrospective study. *PLoS*  
368 *Negl Trop Dis*. 2013;7:e2194.

369 16. Tomashek KM, Gregory CJ, Rivera Sánchez A, Bartek MA, Garcia Rivera EJ,  
370 Hunsperger E, Muñoz-Jordán JL, Sun W. Dengue deaths in Puerto Rico: lessons  
371 learned from the 2007 epidemic. *PLoS Negl Trop Dis*. 2012;6:e1614.

372 17. Carabali M, Hernandez LM, Arauz MJ, Villar LA, Ridde V. Why are people  
373 with dengue dying? A scoping review of determinants for dengue mortality.  
374 *BMC Infect Dis*. 2015;15:301.

375 18. World Health Organization (2009) Dengue: guidelines for diagnosis, treatment,  
376 prevention and control. Geneva: World Health Organization

377 19. Charlson M, Szatrowski TP, Peterson J, Gold J. Validation of a combined  
378 comorbidity index. *J Clin Epidemiol*. 1994;47:1245-51.

379 20. Vincent JL, de Mendonça A, Cantraine F, Moreno R, Takala J, Suter PM,  
380 Sprung CL, Colardyn F, Blecher S. Use of the SOFA score to assess the



- 381 incidence of organ dysfunction/failure in intensive care units: results of a  
382 multicenter, prospective study. Working group on "sepsis-related problems" of  
383 the European Society of Intensive Care Medicine. *Crit Care Med.* 1998;26:1793-  
384 800.
- 385 21. Davidson AC, Banham S, Elliott M, Kennedy D, Gelder C, Glossop A, Church  
386 AC, Creagh-Brown B, Dodd JW, Felton T, Foëx B, Mansfield L, McDonnell L,  
387 Parker R, Patterson CM, Sovani M, Thomas L; BTS Standards of Care  
388 Committee Member, British Thoracic Society/Intensive Care Society Acute  
389 Hypercapnic Respiratory Failure Guideline Development Group, On behalf of  
390 the British Thoracic Society Standards of Care Committee. BTS/ICS guideline  
391 for the ventilatory management of acute hypercapnic respiratory failure in adults.  
392 *Thorax.* 2016;71 Suppl 2:ii1-35.
- 393 22. Teasdale G, Jennett B. Assessment of coma and impaired consciousness. A  
394 practical scale. *Lancet.* 1974;2:81-4.
- 395 23. Section 2: AKI Definition. *Kidney Int Suppl* (2011). 2012;2:19-36.
- 396 24. Shapiro JS, Genes N, Kuperman G, Chason K; Clinical Adenguesory Committee  
397 H1N1 Working Group, New York Clinical Information Exchange, Richardson  
398 LD. Health information exchange, biosurveillance efforts, and emergency  
399 department crowding during the spring 2009 H1N1 outbreak in New York City.  
400 *Ann Emerg Med.* 2010;55:274-9.
- 401 25. Cowan RM, Trzeciak S. Clinical review: Emergency department overcrowding  
402 and the potential impact on the critically ill. *Crit Care.* 2005;9:291-5.
- 403 26. Schull MJ, Mamdani MM, Fang J. Community influenza outbreaks and  
404 emergency department ambulance diversion. *Ann Emerg Med.* 2004;44:61-7.
- 405 27. Nasarudin NM, Mohd Saiboon I, Ismail AK. The role of an emergency

- department short-stay ward in the management of dengue fever: a case-control study in a university hospital. *Eurr J Emerg Med*. 2013;20:335-8.
28. Han GS, Gregory CJ, Biggerstaff BJ, Horiuchi K, Perez-Guerra C, Soto-Gomez E, et al. Effect of a dengue clinical case management course on physician practices in Puerto Rico. *Clin Infect Dis*. 2016;63:1297-303.
29. Rocha C, Silva S, Gordon A, Hammond SN, Elizondo D, Balmaseda A, et al. Improvement in hospital indicators after changes in dengue case management in Nicaragua. *Am J Trop Med Hyg*. 2009;81:287-92.
30. Rowe EK, Leo YS, Wong JG, Thein TL, Gan VC, Lee LK, et al. Challenges in dengue fever in the elderly: atypical presentation and risk of severe dengue and hospital-acquired infection. *PLoS Negl Trop Dis*. 2014;8:e2777.
31. Low JG, Ong A, Tan LK, Chaterji S, Chow A, Lim WY, et al. The early clinical features of dengue in adults: challenges for early clinical diagnosis. *PLoS Negl Trop Dis*. 2011;5:e1191.
32. Lin KH, Chen YS, Chou NK, Huang SJ, Wu CC, Chen YY. The associations between the religious background, social supports, and do-not-resuscitate orders in Taiwan: An observational study. *Medicine (Baltimore)*. 2016;95:e2571.
33. Huang CT, Chuang YC, Tsai YJ, Ko WJ, Yu CJ. High mortality in severe sepsis and septic shock patients with do-not-resuscitate orders in East Asia. *PLoS One*. 2016;11:e0159501.
34. Chang HT, Lin MH, Chen CK, Chou P, Chen TJ, Hwang SJ. Trends of Do-Not-Resuscitate consent and hospice care utilization among noncancer decedents in a tertiary hospital in Taiwan between 2010 and 2014: A Hospital-based observational study. *Medicine (Baltimore)*. 2016;95:e5394.
35. Yuan CR, Lan TY, Tang GJ. Can tracheostomy improve outcome and lower

431 resource utilization for patients with prolonged mechanical ventilation? *Chin*  
432 *Med J (Engl)*. 2015;128:2609-16.

433 36. Thein TL, Ng EL, Yeang MS, Leo YS, Lye DC. Risk factors for concurrent  
434 bacteremia in adult patients with dengue. *J Microbiol Immunol Infect*.  
435 2017;50:314-20

436 37. Lee IK, Liu JW, Yang KD. Clinical characteristics and risk factors for  
437 concurrent bacteremia in adults with dengue hemorrhagic fever. *Am J Trop Med*  
438 *Hyg*. 2005;72:221-6.

439 38. See KC, Phua J, Yip HS, Yeo LL, Lim TK. Identification of concurrent bacterial  
440 infection in adult patients with dengue. *Am J Trop Med Hyg*. 2013;89:804-10.

441 39. Chen CM, Chan KS, Cheng KC, Chou W, Chao HC, Yeh CY, et al. The  
442 exploration of risk factors of concurrent bacteraemia in patients critically ill with  
443 severe dengue. *J Med Microbiol*. 2016;65:1505-11.

444 40. Chen CM, Chan KS, Chao HC, Lai CC. Diagnostic performance of procalcitonin  
445 for bacteremia in patients with severe dengue infection in the intensive care unit.  
446 *J Infect*. 2016;73:93-5.

447 41. Shivanthan MC, Navinan MR, Constantine GR, Rajapakse S. Cardiac  
448 involvement in dengue infection. *J Infect Dev Ctries*. 2015;9:338-46.

449 42. Yacoub S, Griffiths A, Chau TT, Simmons CP, Wills B, Hien TT, et al. Cardiac  
450 function in Vietnamese patients with different dengue severity grades. *Crit Care*  
451 *Med*. 2012;40:477-83.

452 43. Yacoub S, Wertheim H, Simmons CP, Screaton G, Wills B. Cardiovascular  
453 manifestations of the emerging dengue pandemic. *Nat Rev Cardiol*.  
454 2014;11:335-45.

## 455 **Supporting information**

456 **S1 File. The data base of the 60 fatal cases in 2015 dengue outbreak in Tainan.**

457 **S1 Checklist. STROBE Checklist**

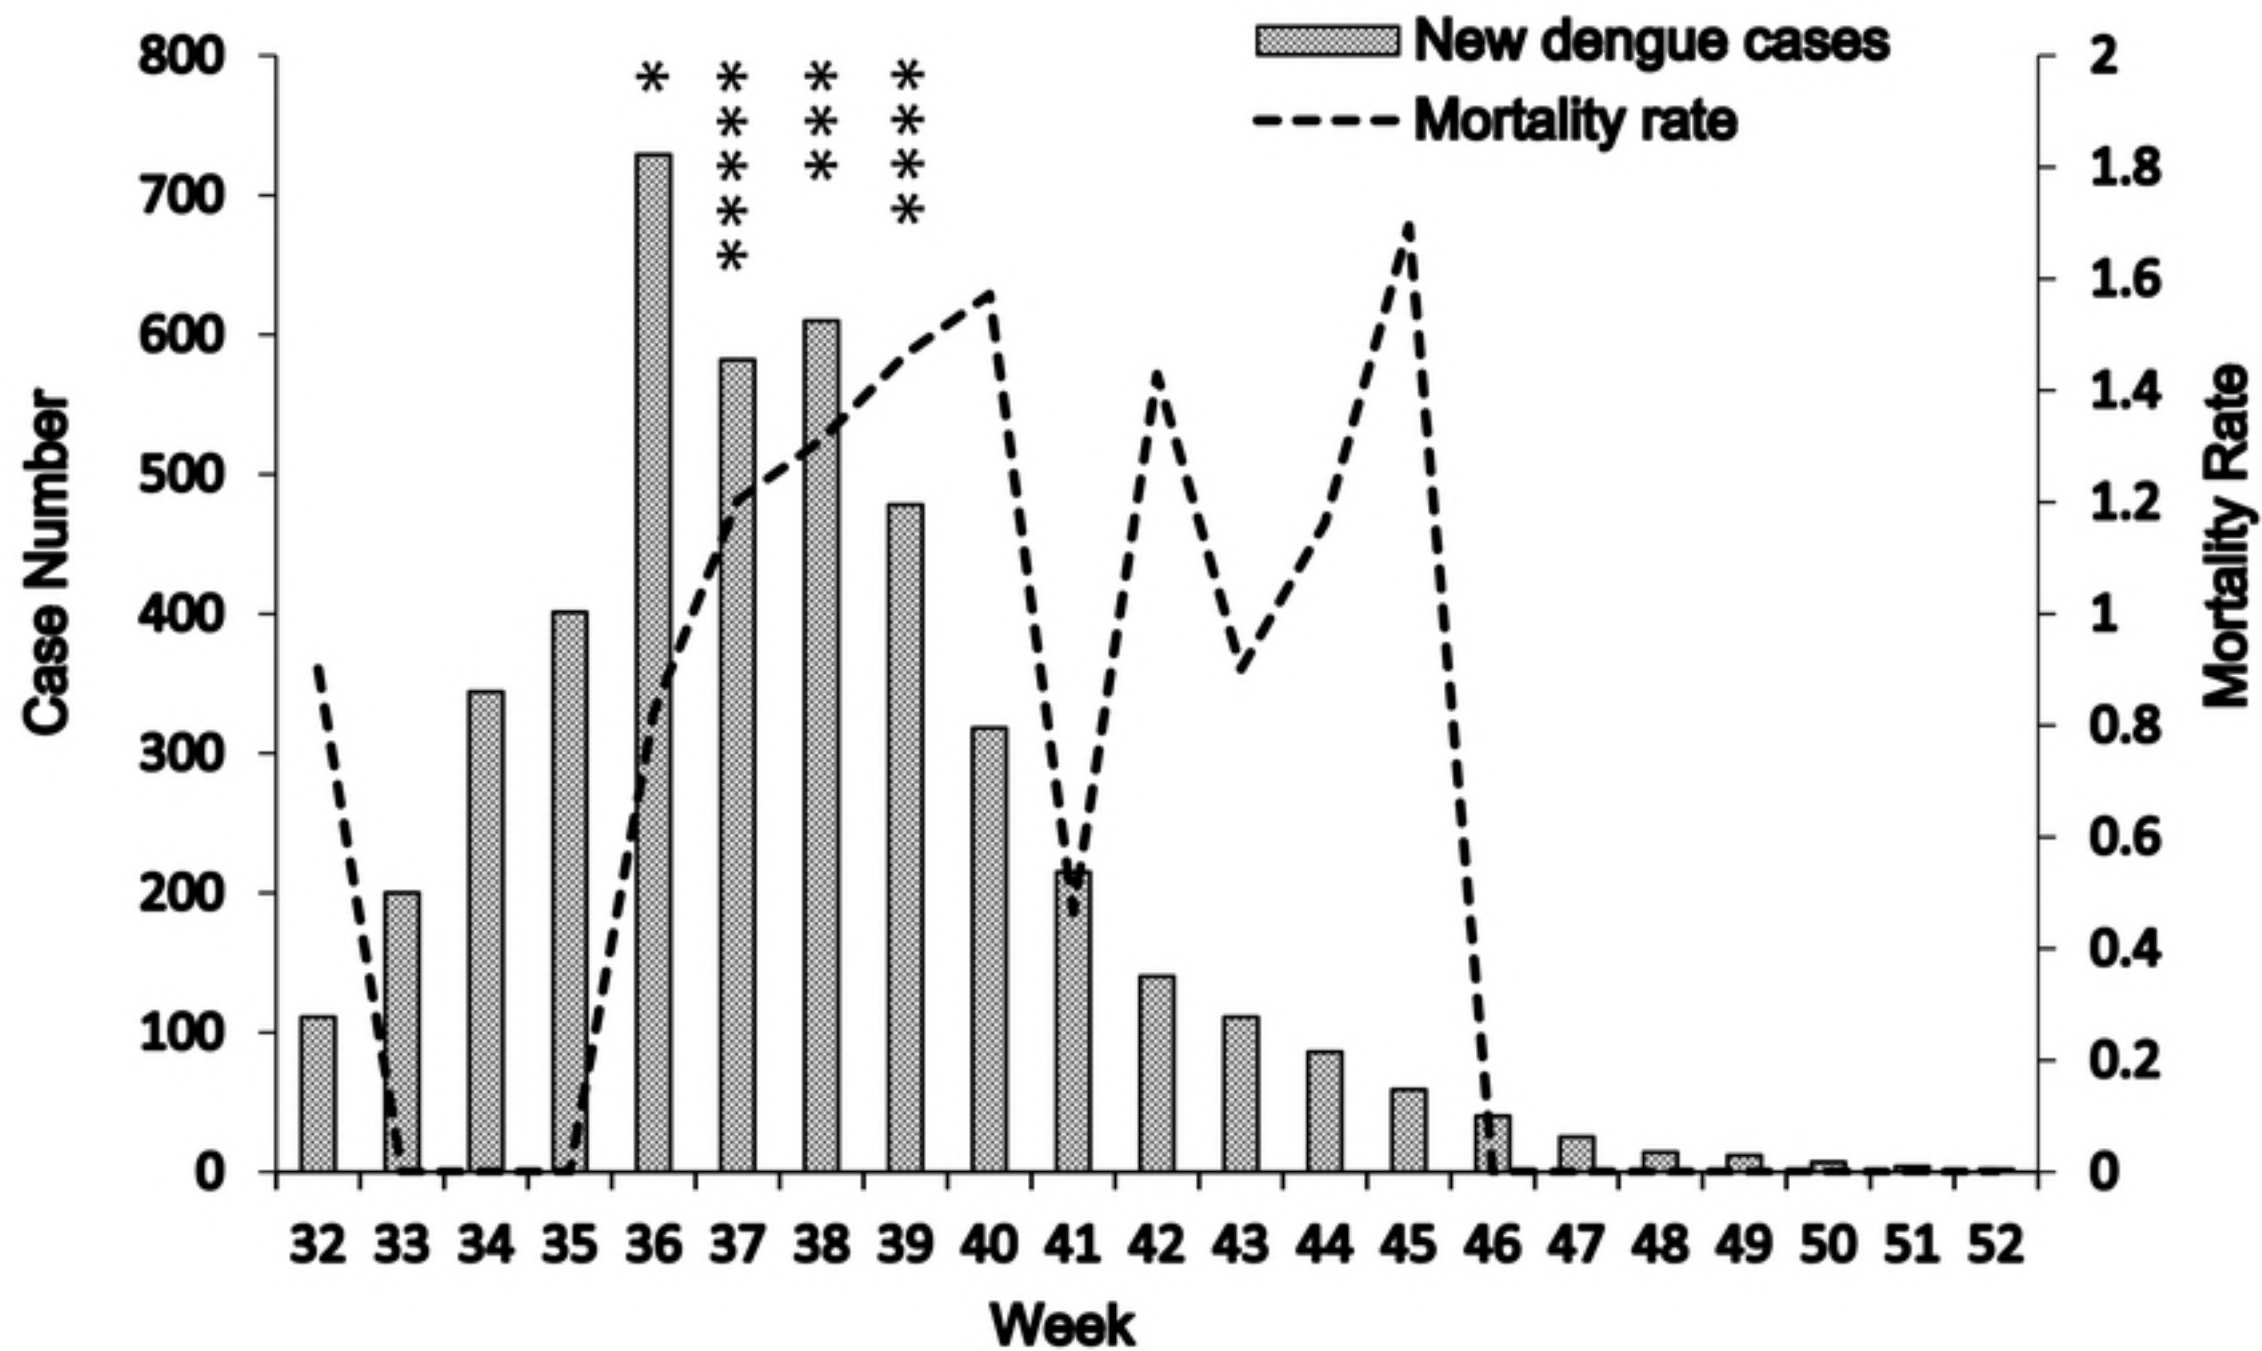

Figure

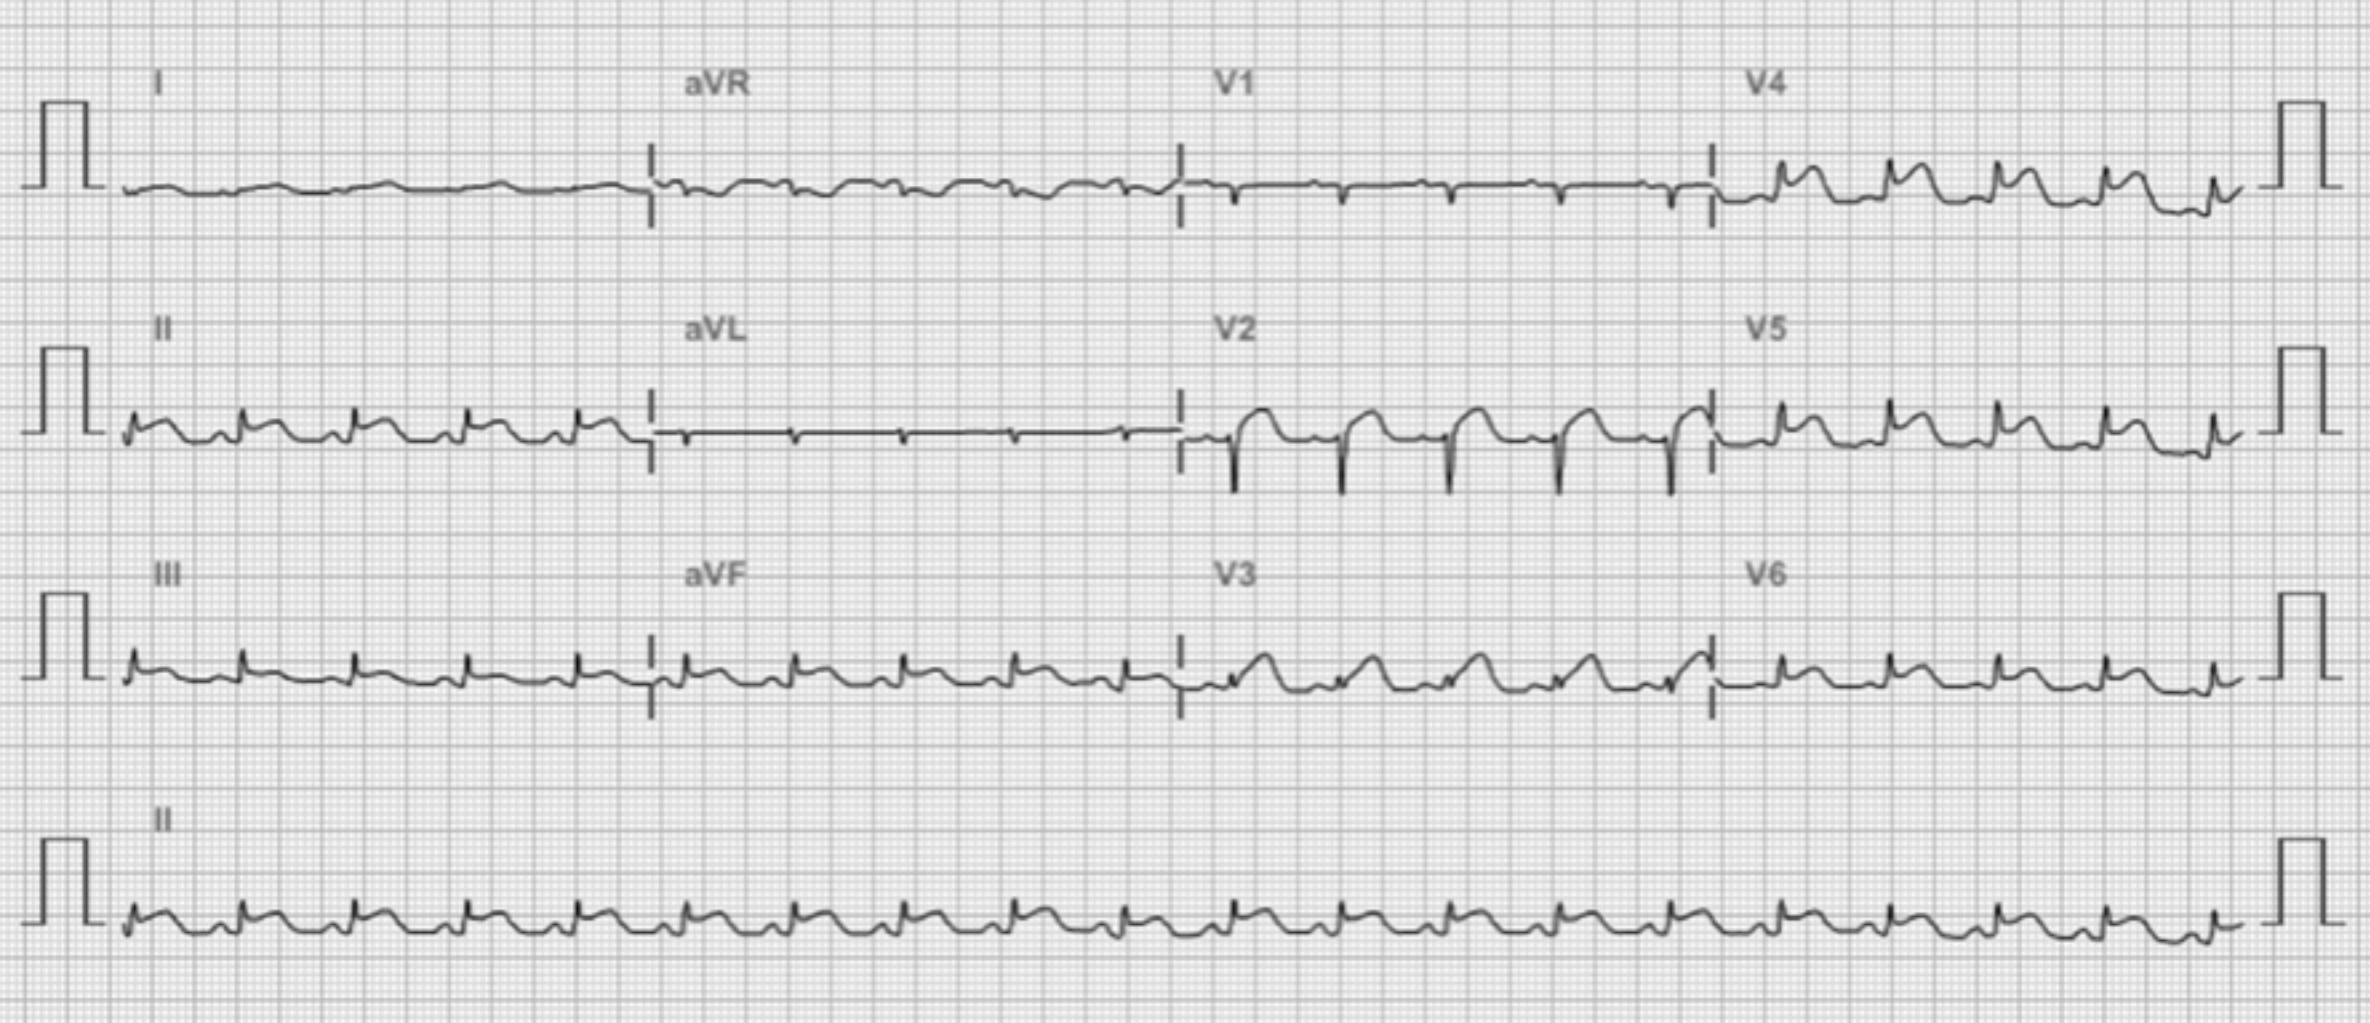

Figure
